# Supplementary material for: Influence of Accelerated Solvent Extraction Conditions on the LC-ESI-MS/MS Polyphenolic Profile, Triterpenoid Content, and Antioxidant and Anti-lipoxygenase Activity of Rhododendron luteum Sweet Leaves
Source: PubMed Central journal article supplement (PMC7555744; doi:10.3390/antiox9090822), 2020-09-03

## SUPPLEMENTARY MATERIAL

# Influence of accelerated solvent extraction conditions on the LC-ESI-MS/MS polyphenolic profile, triterpenoid content, and antioxidant and anti-lipoxygenase activity of *Rhododendron luteum* Sweet leaves

Marta Olech\*, Lena Łyko and Renata Nowak

Department of Pharmaceutical Botany, Medical University, 1 Chodźki Street, 20-093 Lublin, Poland

\* Correspondence: marta.olech@umlub.pl; Tel.: +48 81 448 70 63; Fax : +48 81 448 70 60

**Abstract:** Evaluation of native plant resources and their efficient use is one of the current trends in phytochemistry. The main aim of the present study was to investigate the biological activities of different *Rhododendron luteum* Sweet leaf extracts obtained with the use of accelerated solvent extraction using different solvents and extraction temperatures. All extracts were subjected to bioactivity assays, which revealed considerable anti-lipoxygenase (23.07–90.13% lipoxygenase inhibition) and antiradical potential. All samples exhibited high 2,2-diphenyl-1-picrylhydrazyl (DPPH•) (234.18–621.90 mg Trolox equivalents (TE)/g) and 2,2'-azino-bis-3(ethylbenzthiazoline-6-sulphonic acid) (ABTS<sup>•+</sup>) (88.79–349.41 mg TE/g) scavenging activity, high antioxidant potential in the Oxygen Radical Absorbance Capacity (ORAC) assay (495.77–1011.59 mg TE/g), and moderate ion chelating (Fe<sup>2+</sup>) capacity. The chemical profile of each sample was determined using liquid chromatography/electrospray ionization triple quadrupole mass spectrometry (LC-ESI-MS/MS) and spectrophotometric procedures. Twenty-three compounds representing seven polyphenol subclasses were detected and quantified, including some phenolic acids and flavonoids that had not been previously reported for this plant material. It was shown that 5-*O*-caffeoylquinic acid, protocatechuic acid, catechin, quercetin and its glycosides (hyperoside, isoquercetin, quercitrin), and pentacyclic triterpenes were the dominant secondary metabolites in *R. luteum* leaves. The antioxidant activity was found to be strongly related to different polyphenol groups and total triterpene content, while the anti-lipoxygenase potential was highly dependent on catechin.

**Keywords:** honeysuckle azalea; yellow azalea; Ericaceae, anti-inflammatory activity; antioxidants; flavonoids; phenolic acids; triterpenes; LC-MS; ASE

**Table S1.** Summary of optimized LC-MS/MS parameters used for the qualitative analysis of phenolic acids and flavonoids in the MRM scan mode

| Analyte                                                  | Retention time [min] | Precursor ion [M-H] <sup>-</sup> [m/z] | Product ions [m/z] | Collision energy [eV] |
|----------------------------------------------------------|----------------------|----------------------------------------|--------------------|-----------------------|
| <b>Phenolic acids - Hydroxybenzoic acid derivatives</b>  |                      |                                        |                    |                       |
| Gallic acid                                              | 5.15                 | 168.7                                  | 78.9<br>124.9      | -36<br>-14            |
| Protocatechuic acid                                      | 8.32                 | 152.9                                  | 80.9<br>107.8      | -26<br>-38            |
| 4-Hydroxybenzoic acid                                    | 10.84                | 136.8                                  | 92.9               | -18                   |
| Gentisic acid                                            | 11.32                | 152.9                                  | 80.9<br>107.8      | -110<br>-52           |
| Vanillic acid                                            | 11.41                | 166.8                                  | 107.9<br>123       | -18<br>-12            |
| Syringic acid                                            | 11.42                | 196.9                                  | 122.8<br>181.9     | -24<br>-12            |
| 3-Hydroxybenzoic acid                                    | 12.12                | 136.8                                  | 93<br>75           | -16<br>-48            |
| Salicylic acid                                           | 17.91                | 136.8                                  | 93<br>75           | -16<br>-48            |
| <b>Phenolic acids - Hydroxycinnamic acid derivatives</b> |                      |                                        |                    |                       |
| 5- <i>O</i> -caffeoylquinic acid                         | 9.26                 | 352.9                                  | 190.8<br>84.9      | -24<br>-60            |
| Caffeic acid                                             | 11.34                | 178.7                                  | 88.9<br>134.9      | -46<br>-16            |
| 4-Hydroxycinnamic acid ( <i>p</i> -coumaric acid)        | 14.27                | 162.7                                  | 119<br>93          | -14<br>-44            |
| Sinapic acid                                             | 14.47                | 222.8                                  | 121<br>148.9       | -36<br>-20            |
| Ferulic acid                                             | 14.80                | 192.8                                  | 133.9<br>177.9     | -16<br>-12            |
| Isoferulic acid                                          | 15.22                | 192.8                                  | 133.9<br>177.9     | -16<br>-12            |

|                                                   |       |       |                |            |
|---------------------------------------------------|-------|-------|----------------|------------|
| 3-Hydroxycinnamic acid ( <i>m</i> -coumaric acid) | 15.50 | 162.7 | 119<br>91      | -14<br>-36 |
| Rosmarinic acid                                   | 15.91 | 358.7 | 160.8<br>196.8 | -20<br>-22 |
| 2-Hydroxycinnamic acid ( <i>o</i> -coumaric acid) | 16.80 | 162.7 | 119<br>93      | -14<br>-46 |
| <b>Dihydroflavonols</b>                           |       |       |                |            |
| Taxifolin (dihydroquercetin)                      | 15.18 | 302.7 | 124.9<br>284.8 | -26<br>-14 |
| <b>Flavan-3-ols</b>                               |       |       |                |            |
| Catechin                                          | 9.67  | 288.8 | 244.9<br>109   | -16<br>-32 |
| <b>Flavanones</b>                                 |       |       |                |            |
| Eriodictyol 7- <i>O</i> -rutinoside               | 11.93 | 594.8 | 286.9<br>150.9 | -34<br>-46 |
| Eriodictyol 7- <i>O</i> -glucopyranoside          | 13.06 | 448.8 | 286.9<br>134.9 | -24<br>-48 |
| Naringenin 7- <i>O</i> -glucoside                 | 15.12 | 432.7 | 270.8<br>118.9 | -22<br>-64 |
| Eriodictyol                                       | 17.91 | 286.7 | 134.9<br>150.9 | -32<br>-18 |
| <b>Flavonols</b>                                  |       |       |                |            |
| Quercetin 3,7-dirhamnoside                        | 11.35 | 592.8 | 445.7<br>298.9 | -48<br>-34 |
| Rutin (Quercetin 3- <i>O</i> -rutinoside)         | 11.99 | 608.7 | 299.6<br>270.9 | -46<br>-60 |
| Hyperoside (Quercetin 3- <i>O</i> -galactoside)   | 12.80 | 462.7 | 299.7<br>254.7 | -28<br>-42 |
| Isoquercetin (Quercetin 3- <i>O</i> -glucoside)   | 13.00 | 462.7 | 299.7<br>270.7 | -30<br>-44 |
| Kaempferol 3- <i>O</i> -rutinoside                | 13.31 | 592.7 | 284.8<br>226.7 | -38<br>-68 |
| Astragalín (Kaempferol 3- <i>O</i> -glucoside)    | 14.66 | 446.7 | 226.8<br>254.8 | -54<br>-40 |

|                                                    |       |       |                |            |
|----------------------------------------------------|-------|-------|----------------|------------|
| Quercitrin (Quercetin 3- <i>O</i> -<br>rhamnoside) | 14.83 | 446.7 | 299.7<br>270.7 | -30<br>-40 |
| Myricetin                                          | 16.68 | 316.7 | 136.9<br>150.9 | -32<br>-26 |
| Tiliroside                                         | 17.39 | 592.8 | 284.8<br>254.7 | -38<br>-56 |
| Quercetin                                          | 17.94 | 300.7 | 150.9<br>178.8 | -26<br>-20 |
| 3- <i>O</i> -Methylquercetin                       | 18.13 | 314.7 | 299.8<br>270.8 | -18<br>-26 |
| Kaempferol                                         | 18.85 | 284.7 | 116.8<br>93    | -46<br>-52 |

---

**Flavones**

---

|                                                  |       |       |                |            |
|--------------------------------------------------|-------|-------|----------------|------------|
| Luteolin 3',7'-diglucoside                       | 11.28 | 609.1 | 285<br>447     | -50<br>-32 |
| Isovitexin (Apigenin 6- <i>C</i> -<br>glucoside) | 12.38 | 430.8 | 310.9<br>340.9 | -28<br>-26 |
| Vitexin (Apigenin 8- <i>C</i> -glucoside)        | 12.40 | 430.8 | 310.9<br>340.9 | -26<br>-34 |
| Luteolin 7- <i>O</i> -glucoside                  | 12.87 | 446.8 | 284.8<br>132.9 | -30<br>-78 |
| Luteolin                                         | 17.85 | 284.7 | 132.9<br>150.9 | -38<br>-26 |
| Apigenin                                         | 18.64 | 268.8 | 117<br>106.8   | -44<br>-34 |

---

**Table S2.** Analytical parameters applied in the LC-MS/MS quantitative method

| Analyte                                  | LOD<br>[ng/mL] | LOQ<br>[ng/mL] | R <sup>2</sup> | Linearity range<br>[ng/mL] |
|------------------------------------------|----------------|----------------|----------------|----------------------------|
| <b>Hydroxybenzoic acids</b>              |                |                |                |                            |
| Gallic acid                              | 500            | 750            | 0.9989         | 750-17500                  |
| Protocatechuic acid                      | 300            | 500            | 0.9987         | 1900-19000                 |
| 4-Hydroxybenzoic acid                    | 200            | 250            | 0.9993         | 770-19250                  |
| Gentisic acid                            | 100            | 200            | 0.9993         | 2050-19900                 |
| Vanillic acid                            | 1000           | 1830           | 0.9985         | 1830-18300                 |
| Syringic acid                            | 500            | 732            | 0.9991         | 732-18300                  |
| 3-Hydroxybenzoic acid                    | 400            | 700            | 0.9996         | 1700-34000                 |
| Salicylic acid                           | 600            | 800            | 0.9984         | 1800-18000                 |
| <b>Hydroxycinnamic acids</b>             |                |                |                |                            |
| 5-O-caffeoylquinic acid                  | 100            | 200            | 0.9991         | 200-18000                  |
| Caffeic acid                             | 195            | 389            | 0.9992         | 389-19500                  |
| <i>p</i> -coumaric acid                  | 83             | 200            | 0.9989         | 415-13800                  |
| Sinapic acid                             | 500            | 800            | 0.9992         | 800-38000                  |
| Ferulic acid                             | 1300           | 1900           | 0.9987         | 1900-36000                 |
| Isoferulic acid                          | 1000           | 1600           | 0.9990         | 1800-36000                 |
| <i>m</i> -coumaric acid                  | 75             | 190            | 0.9993         | 1890-37800                 |
| Rosmarinic acid                          | 150            | 198            | 0.9986         | 396-13200                  |
| <i>o</i> -coumaric acid                  | 20             | 40             | 0.9987         | 2000-20000                 |
| <b>Dihydroflavonols</b>                  |                |                |                |                            |
| Taxifolin                                | 20             | 40             | 0.9988         | 40-1000                    |
| <b>Flavan-3-ols</b>                      |                |                |                |                            |
| Catechin                                 | 225            | 350            | 0.9987         | 350-6500                   |
| <b>Flavanones</b>                        |                |                |                |                            |
| Eriodictyol 7- <i>O</i> -rutinoside      | 70             | 120            | 0.9986         | 800-25000                  |
| Eriodictyol 7- <i>O</i> -glucopyranoside | 100            | 250            | 0.9991         | 1670-50000                 |
| Naringenin 7- <i>O</i> -glucoside        | 100            | 170            | 0.9987         | 250-25000                  |

|                                    |      |      |        |            |
|------------------------------------|------|------|--------|------------|
| Eriodictyol                        | 40   | 70   | 0.9986 | 70-6600    |
| <b>Flavonols</b>                   |      |      |        |            |
| Quercetin 3,7-dirhamnoside         | 100  | 250  | 0.9985 | 1670-25000 |
| Rutin                              | 125  | 300  | 0.9983 | 1500-22000 |
| Hyperoside                         | 167  | 250  | 0.9983 | 500-25000  |
| Isoquercetin                       | 167  | 250  | 0.9988 | 2500-50000 |
| Kaempferol 3- <i>O</i> -rutinoside | 60   | 120  | 0.9992 | 120-60000  |
| Astragalin                         | 100  | 250  | 0.9988 | 1670-25000 |
| Quercitrin                         | 75   | 125  | 0.9986 | 750-20000  |
| Myricetin                          | 3200 | 6600 | 0.9992 | 6600-66000 |
| Tiliroside                         | 100  | 250  | 0.9986 | 1000-25000 |
| Quercetin                          | 75   | 125  | 0.9987 | 150-6600   |
| 3- <i>O</i> -Methylquercetin       | 15   | 30   | 0.9991 | 150-10000  |
| Kaempferol                         | 35   | 70   | 0.9990 | 165-3300   |
| <b>Flavones</b>                    |      |      |        |            |
| Luteolin 3',7'-diglucoside         | 250  | 500  | 0.9988 | 1000-22500 |
| Isovitexin                         | 100  | 250  | 0.9994 | 1670-50000 |
| Vitexin                            | 100  | 200  | 0.9984 | 2000-50000 |
| Luteolin 7- <i>O</i> -glucoside    | 50   | 100  | 0.9980 | 250-25000  |
| Luteolin                           | 15   | 30   | 0.9979 | 35-1800    |
| Apigenin                           | 20   | 30   | 0.9981 | 90-4500    |

**Figure S1.** LC-ESI-MS/MS chromatograms (the MRM mode) of flavonoid aglycones found in sample RL140C-M; Monitored MRM transition is given in the bracket: 1 – catechin (m/z 288.8 → 244.9); 2 – taxifolin (m/z 302.7 → 124.9); 3 – myricetin (m/z 316.7 → 136.9); 4 – luteolin (m/z 284.7 → 132.9); 5 – eriodictyol (m/z 286.7 → 134.9); 6 – quercetin (m/z 300.7 → 150.9); 7 – 3-O-methylquercetin (m/z 314.7 → 299.8).

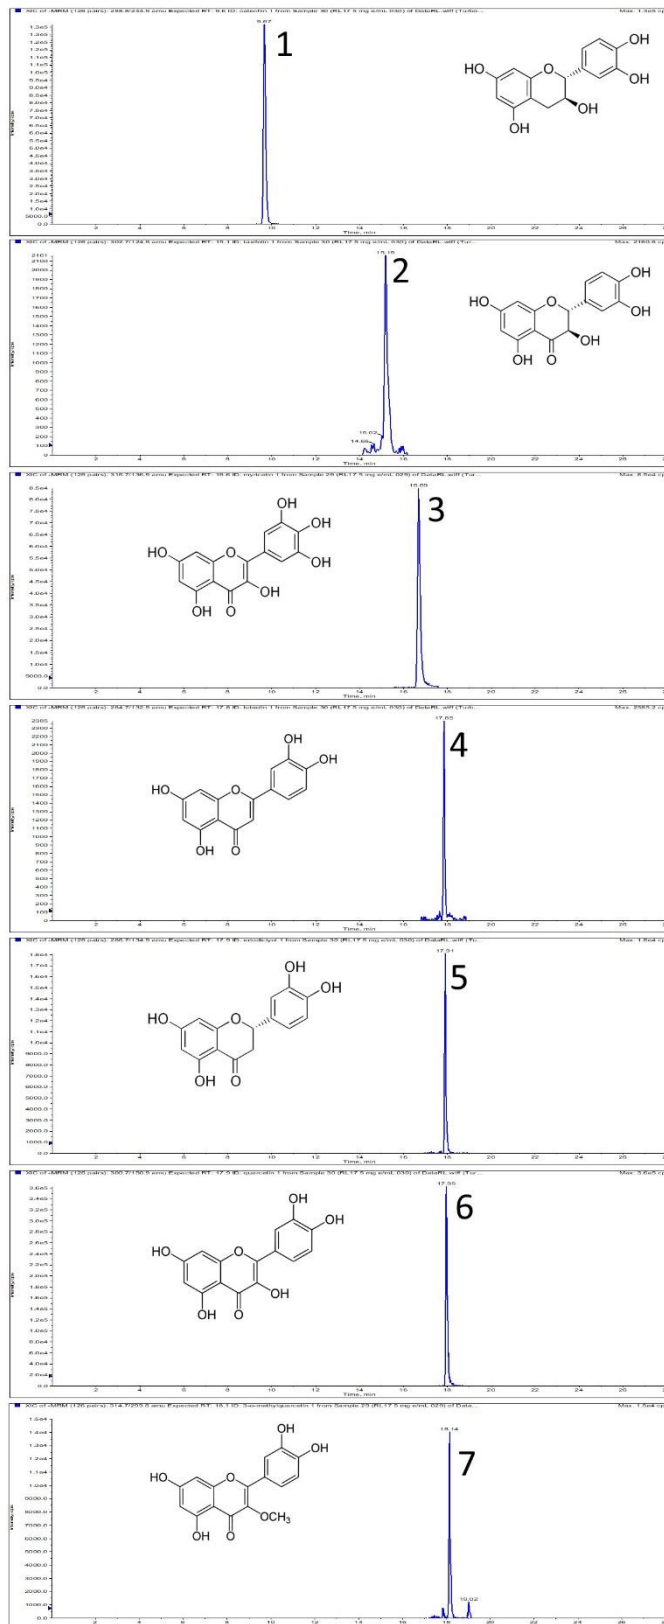

Supplement: antioxidants-09-00822-s001.pdf [file antioxidants-09-00822-s001.pdf]
